# Supplementary material for: An Explicit GIS-Based River Basin Framework for Aquatic Ecosystem Conservation in the Amazon
Source: Copernicus journal article supplement (doi:10.5194/essd-2016-17), 2016-07-20
Supplement: Supplementary file [file essd-2016-17-AC1-supplement.pdf]

1 **1 Title:**

2 An Explicit GIS-Based River Basin Framework for Aquatic Ecosystem Conservation in the Amazon

3 **Authors:**

4 Venticinque, Eduardo<sup>1</sup>, Forsberg, Bruce<sup>2</sup>, Barthem, B. Ronaldo<sup>3</sup>, Petry Paulo<sup>4</sup>, Hess, Laura<sup>5</sup>, Mercado,  
5 Armando<sup>6</sup>, Cañas, Carlos<sup>6</sup>, Montoya, Mariana<sup>6</sup>, Durigan, Carlos<sup>7</sup>, Goulding, Michael<sup>8</sup>

6

7 **Affiliations:**

8 <sup>1</sup>Universidade Federal do Rio Grande do Norte (UFRN), Dept. Ecologia, 59072-970 - Natal, RN – Brazil

9 <sup>2</sup>Instituto Nacional de Pesquisas da Amazônia (INPA), Av. Andre Araujo 2936, Caixa Postal 478, Manaus,  
10 AM, Brazil, 69060-001

11 <sup>3</sup>Museu Paraense Emilio Goeldi (Belém, Pará, Brazil), Caixa Postal 399, Belém, PA, Brazil, 66040-170

12 <sup>4</sup>The Nature Conservancy (TNC), 4245 N. Fairfax Drive, Arlington VA22203, USA & Harvard University,  
13 Cambridge MA 02138, USA

14 <sup>5</sup>Earth Research Institute, University of California, Santa Barbara, California 93106-3060 USA

15 <sup>6</sup>Wildlife Conservation Society (WCS), Av. Roosevelt N° 6360 Miraflores – Lima, Peru

16 <sup>7</sup>Wildlife Conservation Society (WCS), CP 4306, 69083-970, Manaus, Brazil

17 <sup>8</sup>Wildlife Conservation Society (WCS), 2300 Southern Boulevard, Bronx, New York 10460 USA

18

19

20 **Contact email:**

21 [eduardo.venticinque@gmail.com](mailto:eduardo.venticinque@gmail.com) and [brforsberg@gmail.com](mailto:brforsberg@gmail.com)

22

23

24

25

26

27

28

29 **2 Abstract**

30 Despite large-scale infrastructure development, deforestation, mining and petroleum exploration in the  
31 Amazon Basin, relatively little attention has been given to the management scale required for the  
32 protection of wetlands, fisheries and other aspects of aquatic ecosystems. This is due, in part, to the  
33 enormous size, multinational composition and interconnected nature of the Amazon River system, but  
34 also to the absence of an adequate spatial model for integrating data across the entire Amazon Basin. In  
35 this data article we present a spatially uniform multi-scale GIS framework that was developed especially  
36 for the analysis, management and monitoring of various aspects of aquatic systems in the Amazon  
37 Basin. The *Amazon GIS-Based River Basin Framework* is accessible as an ESRI geodatabase at  
38 <https://knb.ecoinformatics.org/#view/doi:10.5063/F1BG2KX8>.

39

40 **3 Key words:** Aquatic ecosystems, Amazon, basins, hydrology, wetlands, monitoring, scale, database

41

42 **4 Introduction**

43 **4.1 Amazon Basin System**

44 The Amazon is the largest river basin in the world. Its strict hydrographical area covers 6.3 million km<sup>2</sup>  
45 (Milliman and Farnsworth, 2011), and when the Tocantins Basin and estuarine coastal areas are included  
46 to define the Amazon Region, the total area is 7.287 million km<sup>2</sup>. The average discharge of the Amazon  
47 River at its mouth is approximately 206,000 m<sup>3</sup>/sec, contributing approximately 17% of all river water  
48 reaching the world's oceans, at least 4 times that of the Congo, the second largest tributary (Richey et  
49 al., 1986; Callede et al., 2010; Callede et al., 2004). Two of the Amazon River's tributaries, the Madeira  
50 and Negro, are also among the 10 largest rivers in the world as measured by average discharge  
51 (Milliman and Farnsworth, 2011). Wetlands occupy 14% of the Amazon Basin (Melack and Hess, 2010)  
52 and play an important role in the ecology and biogeochemistry of this immense fluvial ecosystem. These  
53 environments include nearly all of the 35 inland or coastal wetland types defined by the Ramsar  
54 Convention (Mathews, 2013) but are composed primarily of alluvial floodplain habitats. Tree-dominated  
55 wetlands are the dominant habitat types on the floodplains, often covering 75% or more of inundated  
56 areas where there has not been deforestation (Melack and Hess, 2010; Junk et al., 2012; Cunha et al.,  
57 2015; Melack, 2016). Floodplains are also characterized by lake-like waterbodies where water depth  
58 prevents the establishment of forest but where large rooted and floating herbaceous communities  
59 develop, especially along whitewater rivers that receive nutrients from the Andes (Junk, 1970; Piedade

60 et al., 2010) and are under the strong influence of seasonal inundation pulses, which are monomodal for  
61 most of the lowland region and range from 5-15 m depending on the exact location, but can be bimodal  
62 near the equator or with numerous spikes in or near the Andes. Flooding in the easternmost part of the  
63 Amazon floodplain is tidally influenced though river discharge prevents an invasion of salt water except  
64 during the lowest water period in the Marajó Bay area (Barthem and Schwassmann, 1994). Due to a  
65 backwater effect caused by the temporally different contributions of the southern and northern  
66 tributaries, the Amazon River and the lower courses of most of its tributaries remain in flood longer than  
67 expected from the tributary flood pulses alone (Meade et al., 1991). During the high-water period the  
68 lower courses of the tributary basins also become functionally a part of the Amazon main stem and the  
69 latter, although not a basin, behaves as an ecologically distinct hydrological unit.

70

71 The spatial and temporal variability of the river flood pulse and its influence on inundation patterns in  
72 floodplain environments play a fundamental role in sustaining the diversity and productivity of  
73 floodplain biota and the livelihoods of human populations throughout the Amazon. Infrastructural  
74 development, including plans to construct new dams, roads, and hydrovias across the basin, together  
75 with accelerating land use and climate change, threaten to disrupt this complex hydro-ecological  
76 system, with predictable negative consequences for the biota and river dwelling populations that  
77 depend on its integrity. The conservation and management of the natural resources and services  
78 provided by this ecosystem will require a uniform hydrological framework, covering the entire Amazon  
79 region, specifically adapted for this objective.

80

#### 81 **4.2 Actual spatial framework**

82 River basins are the most natural spatial units of aquatic ecosystems and are also the units generally  
83 used by the agencies or authorities (Agência/Autoridad Nacional de Águas/Agua - ANA) charged with  
84 managing waters in Amazonian countries. The ANAs have traditionally used a basin coding system based  
85 on the work of Otto Pfafstetter, usually called the Pfafstetter Coding System (Pfafstetter, 1989), and the  
86 basins delineated in this system are referred to as Pfafstetter Basins (or Otto-Basins, in Brazil). Each  
87 delineated basin is assigned an identification number that establishes a hierarchical and sequential  
88 arrangement of basins, often with a larger basin divided into at least 9 smaller units (Verdin and Verdin,  
89 1999). The Pfafstetter methodology was applied to the Amazon Basin in the Hydrosheds product (World  
90 Wildlife Fund-US) which includes 12 basin levels (Lehner, 2013), and has also been applied to North  
91 America river basins (Verdin and Verdin, 1999). Pfafstetter Basin classifications, especially those used by

92 the ANAs, will undoubtedly continue to be the geographical basis for water use management in  
93 Amazonian countries, but complementary classifications, adapted for specific local objectives, such as  
94 the development of the Strategic Plan of Hydrological Resources of the Right Margin of the Rio  
95 Amazonas have also been adopted (Agência-Nacional-de-Águas-(Brasil)-ANA, 2012). The Pfafstetter  
96 methodology and most other basin classifications, used to date in the Amazon, have not considered the  
97 main stem and its associated floodplains as a hydrological unit. These areas contain the most productive  
98 river and wetland habitats and should thus be managed in the same way as large tributary basins. By  
99 including the main channel and surrounding floodplains of the Amazon River and its largest tributaries as  
100 discrete sub-basins in a regional basin hierarchy we have produced a new spatially explicit integrated  
101 river basin framework, specifically adapted for the management and conservation of the Amazon fluvial  
102 ecosystem.

103  
104 The digital river networks currently available for the Amazon region also lack some aspects essential for  
105 the management of aquatic ecosystems. The Hydrosheds product  
106 (<http://hydrosheds.cr.usgs.gov/index.php>), the most accurate and regionally uniform river network that  
107 was available previous to the present work, lacks lower order streams which are important habitats for  
108 many aquatic organisms; an equally uniform but higher resolution vector product was thus needed to  
109 include these habitats. Ecologically and geographically important attributes such as stream order, river  
110 name, river length and water type are also needed for a spatially robust conservation and management  
111 framework.

112  
113 Accelerating land use, infrastructure development and resource exploitation present a growing threat to  
114 the integrity of Amazon river ecosystem (Castello and Macedo, 2016). The *Amazon GIS-Based River*  
115 *Basin Framework* presented here, including an ecologically consistent basin hierarchy and a spatially  
116 uniform, high resolution, classified river drainage network, should help by providing a spatial basis to  
117 increase the scope of management and conservation efforts to meet the challenges of large-scale  
118 impacts.

119  
120

#### 121 **4.3 Data**

122 Two types of hydrological data are included in this spatial framework for the Amazon Basin.

123 1. *Polygon*: a hierarchical river basin classification and delineation of main stem floodplains. Main stems  
124 are considered the large downstream segments of the Amazon River and its major tributaries. Although  
125 not basins, per se, these main stem sub-basins contain large areas of wetlands and are important for  
126 fisheries production and aquatic biodiversity in the Amazon Basin. The basin classification contains  
127 seven basin levels of decreasing area, including main stem floodplain sub-basins, thus allowing data  
128 analyses at variable scales.

129 2. *Line*: a new high density drainage network containing important geographical attributes, including  
130 stream order (1 – 11<sup>th</sup> order), tributary name (6 – 11<sup>th</sup> order), river type (6 – 11<sup>th</sup> order) and distance  
131 above the Amazon River mouth (4 – 11<sup>th</sup> order).

132

## 133 **5 Materials and Methods**

134

### 135 **5.1 Acquisition and correction of DEM (Digital Elevation Model)**

136 To obtain a spatially uniform and high-resolution stream network and drainage basin hierarchy for the  
137 Amazon Basin, flow direction and flow accumulation patterns were derived from the 90 m resolution  
138 SRTM-DEM, which was the most accurate DEM available for the South American continent. The near-  
139 global Shuttle Radar Topography Mission (SRTM) digital elevation data set (Farr et al., 2007) was  
140 developed by NASA and the U.S. National Geospatial-Intelligence Agency for the entire Earth using  
141 stereo C-band imagery acquired by the Space Shuttle Endeavour in February of 2000, which corresponds  
142 to the early rising water period in the Central Amazon Region, when the Amazon mainstem begins its  
143 10-12 meter annual flood cycle. The data product has a spatial resolution of 3 arc seconds,  
144 approximately 90 m in the Amazon region, and a vertical accuracy of 1 m locally and 4 m globally. Like  
145 most DEMs derived from synthetic aperture radar, the SRTM-DEM contains regions where useable data  
146 were not obtained (voids) and also regions where spatial variation in elevations are close to the vertical  
147 accuracy of the product, and consequently poorly represented. These latter areas include large lakes,  
148 river channels and wetlands. Furthermore, the SRTM DEM is not a "bare earth" DEM, but represents  
149 the elevation of a scattering centroid that varies as a function of vegetation height and density  
150 (Carabajal and Harding, 2005). For our analysis, we used the version 4.1 DEM available through CGIAR-  
151 CSI (Lehner et al., 2006). This "void-filled" DEM was provided in 6,000 X 6,000 pixel panels which we  
152 mosaicked using the "mosaic tool" available in the Spatial Analyst Extension of ArcGis 10.1 (ESRI, Inc.) to  
153 produce a uniform DEM covering all of South America above 22° south latitude.

154

155 Three additional modifications of the SRTM-DEM mosaic were performed before flow direction patterns  
156 were analyzed to improve the quality of the final drainage network. First, we manually modified the  
157 DEM at one location in the headwaters of the Caquetá River in Colombia where the river passed through  
158 a channel in a large rock formation that was so narrow that it was not represented in the DEM. To  
159 ensure that water “flowed” through this point in the final stream network, it was necessary to  
160 “excavate” the channel digitally so that it was wider than the 90 m resolution of the DEM image. To  
161 ensure that the main river channels followed the correct path as they crossed the extensive floodplains  
162 in the central Amazon lowlands, we also “burned” all channels above 7<sup>th</sup> order into the DEM, using the  
163 trajectories of these rivers derived from the lower resolution Hydrosheds product (Lehner et al., 2008).  
164 The “DEM Reconditioning” tool in the Hydro Tools extension of ArcGIS 10.1 was used to accomplish this.  
165 Finally, the “Fill Sinks” tool in the Hydro Tools extension of ArcGIS was used to fill any remaining  
166 depressions in the reconditioned DEM which might impede water flow.

167

## 168 **5.2 Area of basins and length of river calculations**

169 For all calculations of area of the basins, length of rivers and distance to the mouth we used the Albers  
170 projection with the following parameter configuration (Table 1).

171

## 172 **5.3 Drainage network development**

173 Once the DEM was corrected, the “Flow Direction” tool in the Spatial Analyst Extension of ArcGIS was  
174 used to map the directional pattern of flow through the entire DEM mosaic. The resulting flow direction  
175 grid image was then used together with the Spatial Analyst “Flow Accumulation” tool to map the spatial  
176 patterns of accumulated flow, based on accumulated upstream drainage area, and to generate a flow  
177 accumulation grid image. The flow accumulation grid was then used to generate a stream grid in raster  
178 format with the Hydro Tools “Stream Definition” tool. The “stream threshold” value, specified with the  
179 stream definition tool, determines the size of the upstream drainage area at which the stream grid  
180 begins to be delineated, and consequently the final resolution of the drainage network. This threshold is  
181 specified in upstream pixels, which in the SRTM-DEM represent approximately 0.81 hectare.

182

183 A stream grid with an upstream stream threshold of 100 pixels (approximately 81 ha) was used together  
184 with the flow direction grid and the Spatial Analyst “Stream Order” tool to create an ordered (Strahler,  
185 1957) high resolution stream grid. This ordered stream grid was then vectorized with the Spatial Analyst  
186 “Stream to Feature” tool to produce a single high resolution stream network shape file for the entire

187 Amazon Basin containing a stream order attribute. The calculated stream order varied from 1 to 11 in  
188 this product which is probably underestimated by 1 order, since the drainage areas of first order  
189 streams, defined according to Strahler (Strahler, 1957) as permanent streams with no permanent  
190 upstream tributaries, tend to vary from 10-50 ha in the central Amazon Basin. Assuming that this is  
191 correct, the smallest streams in the stream network developed here would be approximately 2nd order  
192 and the Amazon River main channel near its mouth would be 12th order. The order included in the  
193 attribute table of the final shapefile was the value generated originally by the stream order tool. Three  
194 different stream network shapefiles were created from this high resolution product, containing streams  
195 from 1-11<sup>th</sup> order, 6 – 11<sup>th</sup> order and 7 – 11<sup>th</sup> order, respectively. Tributary names, derived from existing  
196 data bases, were added to the 6 – 11<sup>th</sup> order river network.

197  
198 The shapefile containing 1-11<sup>th</sup> order streams was filtered to remove anomalous 1st to 3rd order  
199 streams which were generated on open water surfaces and wetlands due to the inaccuracy of the DEM  
200 and the flow direction grid that was generated from it. These anomalies consisted of spurious low order  
201 stream segments, generated predominantly in low relief wetland environments where variation in  
202 elevation was either extremely low (open water environments) or due primarily to variations in  
203 vegetation height. The filter eliminated 1-3 order streams present in the wetland mask and stream  
204 segments adjacent to and intersecting the mask that were delimited by BL7 basins. While most of the  
205 anomalous segments were removed by the filter, some are still apparent at higher resolutions.  
206 The length (km) of each segment in the full resolution network was also determined with ArcGIS 10.1 in  
207 South America Albers Equal Area Conic projection.

208  
209 **5.4 Development of basin hierarchy**  
210 Seven different scales or hierarchical levels were delineated in our basin hierarchy, denominated Basin  
211 Level 1- Basin Level 7 (BL1-BL7) (Fig. 1 and Fig. 2).

212 **Basin code generation**, Basin codes for BL1 and BL4 basins were derived from the names of the  
213 principal rivers in each polygon. Codes for BL5 – BL7 basins were created combining the  
214 associated BL2 basin name with the ID numbers generated automatically when each basin was  
215 delimited.

216 **Basin Level 1 (BL1), Regional basins** - divides the working area into 3 drainage polygons: one  
217 large polygon containing the Amazon and Tocantins river basins; and two smaller ones  
218 containing the northern and southern coastal basins draining directly into the Atlantic.

219 **Basin Level 2 (BL2), Major Amazon Tributary basins** - delimits all tributary basins larger than  
220 100,000 km<sup>2</sup> (main basins) whose main stems flow into the Amazon River main channel, as well  
221 as an Amazon River Main Stem polygon that consists of the open waters of the Amazon River, its  
222 floodplain and adjacent small tributary basins (Fig. 3).

223 **Basin Level 3 (BL3), Major Tributary Basins** - delimits all basins larger than 100,000 km<sup>2</sup>,  
224 including those that do not flow directly into the Amazon River main channel; all tributary basins  
225 larger than 10,000 km<sup>2</sup> and less than 100,000 km<sup>2</sup> that flow into the Amazon River Main Stem;  
226 and a single central floodplain drainage polygon.

227 **Basin Level 4 (BL4), Minor Tributary Basins** - delimits all tributary basins greater than 10,000 km<sup>2</sup>  
228 and less than 100,000 km<sup>2</sup>. Floodplain drainages include all tributaries with basins less than  
229 10,000 km<sup>2</sup> flowing toward the floodplain at high water.

230 **Basin Levels 5-7, Minor sub-basins** - The remaining three basin levels, BL5, BL6 and BL7, were  
231 created by subdividing BL4 basins into drainage subunits with threshold sizes of 5,000, 1,000  
232 and 300 km<sup>2</sup>, respectively.

233  
234 Basin grids for major Amazon tributaries (BL2), major tributaries (BL3) and minor tributaries (BL4) were  
235 created from the flow direction grid and a point shapefile for basin outlets using the watershed  
236 delineation tool of ArcHydro 2.0 for ArcGis. Basin outlets were created with the point generation feature  
237 of this tool. Basin grids were converted to polygon shapefiles using the Hydro Tools “polygon  
238 processing” tool. All major and minor tributary basins were attributed areas and the name of the  
239 principal tributaries in each polygon. Sub-basin grids with thresholds of 5,000 (BL5), 1,000 (BL6) and 300  
240 km<sup>2</sup> (BL7) were created for the entire Amazon Basin using the flow direction grid, segmented stream  
241 grids developed at these scales and the Hydro Tools “catchment grid delineation” tool. These sub-basin  
242 grids were then transformed into separate polygon shapefiles using the Hydro Tools “catchment  
243 polygon processing” tool. General characteristics and statistics for each basin level are summarized in  
244 Table 2.

245

## 246 **5.5 Definition of floodplain drainage polygons**

247 Large river floodplains play an important role in the Amazon, sustaining aquatic primary production and  
248 fish yields in the region. At high water, when the inundated area of floodplains is greatest, many small  
249 tributaries are completely flooded altering regional drainage patterns. Many of these tributaries which  
250 are independent of the main channel at low water are “captured” by flooding and incorporated in the



251 mainstem drainage at high water. Due to their ecological importance, we prioritized these high water  
252 drainage patterns in the delineation of floodplain drainage polygons. The drainage areas of major  
253 tributary floodplains were delineated initially at the BL4 level with the drainage network derived from  
254 the DEM and then adjusted manually with a wetland mask to better represent high water drainage  
255 patterns. The wetland mask used to identify floodplain environments was generated by (Hess et al.,  
256 2003) from the analysis of JERS-1 L band radar imagery covering most of the lowland Amazon Basin  
257 acquired during both low and high water periods. Detailed methods are provided in the original  
258 reference. Wetlands were defined as areas that were inundated during either of both periods together  
259 with areas adjacent to flooded areas which displayed landforms consistent with floodplain  
260 geomorphology. Tidal wetlands in the lower Amazon and Tocantins rivers that were missing from this  
261 product were delineated here using a similar methodology and then annexed to the larger Amazon  
262 Basin mask. The final wetland mask, together with the BL5 and BL7 sub-basin shape files, was used to  
263 identify and delimit the floodplain drainages of major tributaries. Floodplain drainages were defined to  
264 include all main stem floodplain wetlands identified with the mask plus all upland sub-basins less than  
265 10,000 km<sup>2</sup> that flowed directly into them. All tributary wetland drainage polygons were attributed with  
266 the name of the associated major tributary. The floodplain drainage associated with the Amazon River  
267 Main Stem was further divided into four areas based on geomorphology (Dunne et al., 1998), habitat  
268 distribution (Hess et al., 2015) and fisheries.

269  
270 Once all major floodplain drainages were delineated, vectored data and metadata were added and they  
271 were aggregated as polygons to the BL4 shape file and as attributes to the BL5, BL6 and BL7 shape files.

272

## 273 **5.6 Classification of river type**

274 Water quality or type varies considerably in the Amazon River system and has been shown to have a  
275 major influence on biogeochemical processes and on the distribution and dynamics of aquatic habitats  
276 and biota. There are three main types of rivers in the Amazon Basin based on natural differences in  
277 water color and quality (Sioli, 1968): 1) *whitewater rivers*, with neutral pH, rich in suspended sediments  
278 and nutrients, 2) *blackwater rivers*, low in pH, nutrients and suspended sediments, high in dissolved  
279 organic carbon and 3) *clearwater rivers*, low to neutral pH, low in nutrients, suspended sediments and  
280 dissolved organic carbon. We defined water type (white, black or clear) in 6<sup>th</sup> – 11<sup>th</sup> order rivers based  
281 on regional knowledge and visual analysis of optical imagery of various resolutions available through

282 Google Earth (Google Inc). The resulting assignment of river types based on water color is shown in  
283 Figure 4; it represents a first approximation based on current knowledge.

284

### 285 **5.7 Definition and mapping of fish spawning nodes**

286 Many migratory characiform fish species spawn at the confluences of whitewater and blackwater or  
287 clearwater rivers. These fish spawning nodes were identified and incorporated in a shapefile for 6<sup>th</sup> –  
288 11<sup>th</sup> order rivers. The “feature vertices to points” tool in ArcGis 10.1 was used to convert the last  
289 downstream drainage line before each confluence in the 6<sup>th</sup> – 11<sup>th</sup> order river network into a point. Next  
290 a buffer of 1,000 meters around each point was generated in order to define the confluence areas  
291 where spawning takes place. For each buffer area a spatial join was applied for the following  
292 information: order and type of tributary and order and type of river into which tributary flows.  
293 Important confluence areas for spawning were then derived from the intersection of spawning nodes  
294 and sub-basins or main stem drainages important for commercial fishing. The resulting distribution of  
295 fish spawning zones is indicated in Figure 5.

296

### 297 **5.8 River distances**

298 Distances along the river network from the mouth of the Amazon River to specific points in the river  
299 system can be important for characterizing spawning routes and calculating the resident time and  
300 velocities of fish larvae/juvenile during downstream migrations and other materials in the system.  
301 Distances from the Amazon’s mouth to all stream segments between 4<sup>th</sup> – 11<sup>th</sup> order were calculated  
302 using the Barrier Analysis Tool (BAT) extension for ArcMap 10.1 developed for The Nature Conservancy  
303 (Software Developer: Duncan Hornby of the University of Southampton’s GeoData Institute). The tool  
304 uses point data to divide a routed river network (polylines with from-node and to-node coding) into  
305 connected networks from which a direct path distance calculation can then be made. The data provide  
306 not only distances to specific points from the Amazon River mouth but also to distant regions (Fig. 6).  
307 Distance values and stream order were included as segment attributes in the final river network  
308 shapefile.

### 309 **6 Data availability**

310 Interested researchers can access the data and metadata  
311 at <https://knb.ecoinformatics.org/#view/doi:10.5063/F1BG2KX8> (Eduardo Venticinque, Bruce Forsberg,

312 Ronaldo B. Barthem, Paulo Petry, Laura Hess, Armando Mercado, Carlos Canas, Mariana Montoya,  
313 Carlos Durigan, and Michael Goulding. 2016. SNAPP Western Amazon Group - Amazon Aquatic  
314 Ecosystem Spatial Framework. KNB Data Repository).

## 315 **7 Conclusions**

316 The multi-level basin hierarchy and classified river network presented here provides a new spatial  
317 framework for analyzing aquatic and terrestrial data at a variety of sub-basin levels, including the  
318 Amazon Basin and Amazon Region as a whole. Its architecture is appropriate for use in the monitoring  
319 and management of aquatic ecosystems, especially within an integrated river basin management  
320 framework at distinct spatial scales. The principal data products provided in the GIS include:

- 321 1. A multi-level basin hierarchy specifically designed for the conservation and management of  
322 river basins and floodplain environments at a variety of basin and sub-basin scales.
- 323 2. A high resolution, spatially uniform, ordered drainage network for the Amazon Basin and  
324 its adjacent coastal basins (Coastal North, Coastal South and Tocantins).
- 325 3. A first approximation of river types based on water color as a proxy for distinct chemical  
326 characteristics, included as an attribute for 6-11th order tributaries.
- 327 4. Estimates of the distance of individual stream segments from the mouth of the Amazon  
328 River, included as an attribute for 4-11th order streams in the Amazon basin.
- 329 5. A point shape file indicating confluences (nodes) of different river types that are critical  
330 spawning zones for migrating fish species.

331 This regional hydrological database provides a coherent framework for the integration and analysis a  
332 wide array of spatial data, critical for management and conservation of this valuable fluvial ecosystem.  
333

## 334 **8 Team List (Author contributions)**

335 MG coordinated the general development of this GIS framework, EV and BF processed the data to  
336 generate the hydrography and basins; EV, BF, RB, MG, and PP prepared the manuscript with  
337 contributions from AM, CC, MM and CD. LH prepared the wetland mask for the Tocantins Basin and the  
338 estuary to complete the wetland mask for most of the Amazon Basin.

## 339 **9 Copyright statement**

340 NA

341  
342  
343  
344  
345  
346  
347  
348  
349  
350  
351  
352  
353  
354  
355  
356  
357  
358  
359  
360  
361  
362  
363  
364  
365  
366  
367  
368

**10 Appendices**

NA

**11 Supplement Link**

NA

**12 Team List**

NA

**13 Acknowledgements**

The synthetic work for this paper was supported by the Science for Nature and People Partnership (SNAPP) project sponsored by the National Center for Ecological Analysis and Synthesis (NCEAS), the Wildlife Conservation Society (WCS) and the Nature Conservancy (TNC). At WCS we thank Cristián Samper, John Robinson, Julie Kunen, Mariana Varese, Guillermo Estupiñán, Micaela Varese, Natalia Piland and Sofia Baca; for SNAP workshop support we thank Charo Lanao; at TNC Craig Groves and Peter Kareiva; at NCEAS Frank Davis, Lee Ann French, Mark Schildhauer, Julien Brun and Gabriel Daldegan. For general foundational support we thank Avecita Chicchón (Gordon & Betty Moore Foundation and previously the Wildlife Conservation Society (WCS) and the MacArthur Foundation), Adrian Forsyth (The Andes-Amazon Fund and previously the Blue Moon Fund), Rosa Lemos da Sá (Funbio, Brazil and previously the Gordon & Betty Moore Foundation) and Enrique Ortiz (The Andes-Amazon Fund and previously Gordon & Betty Moore Foundation). We also thank the Museu Paraense Emilio Goeldi (MPEG) and the Instituto Nacional de Pesquisas da Amazônia (INPA) for their support. For fisheries data we are indebted to the following institutions and their respective individuals: Instituto de Desenvolvimento Sustentável Mamirauá, Brazil (Helder Queiroz, Pollianna Santos Ferraz); the Colônia de Pescadores de Porto Velho, Brazil; the Dirección Regional de la Producción (DIREPRO), Peru; Eletronorte - Centrais Elétricas do Norte do Brasil S/A, Brazil; the Ministério da Agricultura, Pecuária e Abastecimento (MAPA), Brazil; the Ministério da Pesca e Aquicultura (MPA), Brazil; the Projeto Manejo

369 dos Recursos Naturais da Várzea (Provárzea), Brazil and Junior Chuctaya (Museo de Historia Natural,  
370 Universidad Nacional Mayor de San Marcos). Meteorological data were supplied by the Servicio  
371 Nacional de Meteorología e Hidrología del Perú (SENAMHI). Financial support was provided by the David  
372 and Lucile Packard Foundation (Grant # 2013-38757 & #2014-39828) - <https://www.packard.org/>; Ward  
373 Woods (Grant # 309519) ; Wildlife Conservation Society (WCS) - [www.wcs.org/](http://www.wcs.org/); The Nature Conservancy  
374 (TNC) - [www.nature.org](http://www.nature.org); and the Gordon and Betty Moore Foundation (Grant 500) -  
375 <https://www.moore.org/>. EMV received a productivity grant from the Conselho Nacional de Pesquisas -  
376 CNPq (309458/2013-7). LH received support from NASA's Land-Cover and Land-Use Change program  
377 (NNX12AD27G).

#### 378 **14 Disclaimer**

379 NA

#### 380 **15 References**

- 381 Agência-Nacional-de-Águas-(Brasil)-ANA: Plano Estratégico de Recursos Hídricos dos Afluentes da  
382 Margem Direita do rio Amazonas: Resumo Executivo, Agência Nacional de Águas (ANA, Brasil),  
383 Brasília, 144 pp., 2012.
- 384 Barthem, R. B., and Schwassmann, H. O.: Amazon river influence on the seasonal displacement of the  
385 salt wedge in the Tocantins River Estuary, Brazil, 1983-1985, Boletim do Museu Paraense Emílio  
386 Goeldi (Zoologia), 10, 119-130., 1994.
- 387 Callede, J., Guyot, J., Ronchail, J. L., Hote, Y., Niel, H., and Oliveira, E.-d.: Evolution du d'ébit de  
388 l'Amazone `a Obidos de 1903 `a 1999, Hydrolog. Sci. J, 49, 85-98, 2004.
- 389 Callede, J., Cochonneau, G., Ronchail, J., Alves, V., Guyot, J., Guimaraes, V., and Oliveira, E.-d.: Les  
390 apports en eau de l'Amazone a l'Ocean Atlantique, Rev. Sci. l'Eau, 23, 247-273, 2010.
- 391 Carabajal, C. C., and Harding, D. J.: .ICESat validation of SRTM C-band Digital Elevation Models,  
392 Geophysical Research Letters, L22S01, 2005.
- 393 Castello, L., and Macedo, M. N.: Large-scale degradation of Amazonian freshwater ecosystems, Global  
394 Change Biology, 22, 990–1007, 2016.
- 395 Cunha, C. N. d., Piedade, M. T. F., and J., J. W.: Classificação e Delineamento das Áreas Úmidas  
396 Brasileiras e de Seus Macrohabitats, EdUFMT, Cuiabá, 2015.
- 397 Dunne, T., Mertz, L. A. K., Meade, R. H., Richey, J. E., and Forsberg, B. R.: Exchange of sediment between  
398 the channel and floodplain of the Amazon River, Brazil Geological Society of America Bulletin  
399 110, 450-467, 1998.
- 400 Farr, T. G., Rosen, P. A., Caro, E., Crippen, R., Duren, R., Hensley, S., Kobrick, M., Paller, M., Rodriguez, E.,  
401 Roth, L., Seal, D., Shaffer, S., Shimada, J., Umland, J., Werner, M., Oskin, M., Burbank, D., and  
402 Alsdorf, D.: The shuttle radar topography mission, Reviews of Geophysics, 45, 1-33, 2007.
- 403 Hess, L. L., Melack, J. M., Novo, E. M. L. M., Barbosa, C. C. F., and Gastil, M.: Dual-season mapping of  
404 wetland inundation and vegetation for the central Amazon Basin, Remote Sensing of  
405 Environment, 87, 404-428, 10.1016/j.rse.2003.04.001, 2003.
- 406 Hess, L. L., Affonso, A. G., and Barbosa, C.: Amazonian wetlands: Extent, vegetative cover, and dual  
407 season inundation area, Wetlands 35, 745-756, 2015.

408 Junk, W. J.: Investigations on the ecology and production-biology of the floating meadows (Paspalo-  
409 Echinochloetum) on the middle Mamazon. Part I: The floating vegetation and its ecology,  
410 Amazoniana, 2, 449-495, 1970.

411 Lehner, B., Verdin, K., and Jarvis, A.: HydroSHEDS, HydroSHEDS, Technical Documentation, 1, 1-27, 2006.

412 Lehner, B., Verdin, K., and Jarvis, A.: New global hydrography derived from spaceborne elevation data  
413 Eos Transactions, AGU, 89, 93-94, 2008.

414 Lehner, B., Grill G.: Global river hydrography and network routing: baseline data and new approaches to  
415 study the world's large river systems, Hydrological Processes, 27, 2171-2186, 2013.

416 Mathews, G. V. T.: The Ramsar Convention on Wetlands: Its History and Development, Ramsar  
417 Convention Bureau, Gland, Switzerland, 90 pp., 2013.

418 Meade, R. H., Conceição, S. d., Rayol, J. M., and Natividade, J. R. G.: Backwater effects in the Amazon  
419 River basin of Brazil, Environmental Geology and Water Sciences 18, 105-114, 1991.

420 Melack, J., and Hess, L.: Remote sensing of the distribution and extent of wetlands in the Amazon Basin  
421 in: Amazonian Floodplain Forests: Ecophysiology, Biodiversity and Sustainable Management,  
422 edited by: Junk, W. J., Piedade, M. T. F., Wittmann, F., Schöngart, J., and Parolin, P., Springer  
423 Verlag, 2010.

424 Melack, J.: Aquatic ecosystems, in: The Large-scale Biosphere Atmosphere Experiment in Amazonia,  
425 edited by: Nagy, L., Forsberg, B., and Artaxo, P., Ecological Studies, Springer, 2016.

426 Milliman, J. D., and Farnsworth, K. L.: River Discharge to the Coastal Ocean: A Global Synthesis,  
427 Cambridge University Press, Cambridge, 2011.

428 Pfafstetter, O.: Classificação de Bacias Hidrográficas – Metodologia de Codificação, Rio de Janeiro, 1-19,  
429 1989.

430 Piedade, M. T. F., Junk, W., D'Ângelo, S. A., Wittmann, F., Schöngart, J., Barbosa, K. M. d. N., and Lopes,  
431 A.: Aquatic herbaceous plants of the Amazon floodplains: State of the art and research needed,  
432 Acta Limnológica Brasiliensia, 22, 165-178, 10.4322/actalb.02202006, 2010.

433 Richey, J. E., Meade, R. H., Salati, E., Devol, A. H., and Santos, U.: Water discharge and suspended  
434 sediment concentrations in the Amazon River: 1982-1984, Water Resources Research, 22, 756-  
435 764, 1986.

436 Sioli, H.: Hydrochemistry and geology in the Brazilian Amazon region, Amazoniana, 1, 267-277, 1968.

437 Strahler, A. N.: Quantitative analysis of watershed geomorphology, Transactions of the American  
438 Geophysical Union, 38, 913-920, 1957.

439 Verdin, K. L., and Verdin, J. P.: A topological system for delineation and codification of the Earth's river  
440 basins, Journal of Hydrology, 218, 1-12, 1999.

441  
442  
443  
444  
445  
446  
447  
448  
449  
450

451  
452  
453  
454  
455  
456  
457  
458  
459  
460  
461  
462  
463  
464  
465  
466  
467  
468

Table 1 - Parameters configuration of projection used for all calculations of area and length in this database.

| Parameter           | Value                                 |
|---------------------|---------------------------------------|
| Projection          | South America Albers Equal Area Conic |
| False_Easting       | 0.00000000                            |
| False_Northing      | 0.00000000                            |
| Central_Meridian    | -60.00000000                          |
| Standard_Parallel_1 | -5.00000000                           |
| Standard_Parallel_2 | -42.00000000                          |
| Latitude_Of_Origin  | -32.00000000                          |
| Linear Unit         | Meter                                 |

469  
470  
471  
472  
473  
474  
475  
476  
477  
478  
479  
480  
481  
482

Table 2 - General description of catchments system for Amazon Region.

| <b>General description</b>                                                 | <b>Level</b> | <b>N<br/>catchments</b> | <b>Average area<br/>(km<sup>2</sup>)</b> | <b>Main<br/>Stem</b> |
|----------------------------------------------------------------------------|--------------|-------------------------|------------------------------------------|----------------------|
| Amazon and coastal basins                                                  | BL1          | 3                       |                                          | No                   |
| Major Amazon tributary basins > 100,000 km <sup>2</sup>                    | BL2          | 21                      | 385,386                                  | Yes                  |
| Major tributary basins > 100,000 km <sup>2</sup>                           | BL3          | 38                      | 170,277                                  | Yes                  |
| Minor tributary basins < 100,000 km <sup>2</sup> & >10,000 km <sup>2</sup> | BL4          | 199                     | 36,625                                   | Yes                  |
| 10,000 km <sup>2</sup> < Sub-basins > 5000 km <sup>2</sup>                 | BL5          | 1075                    | 6,811                                    | No                   |
| 5000 km <sup>2</sup> < Sub-basins > 1000 km <sup>2</sup>                   | BL6          | 4606                    | 1,589                                    | No                   |
| 1000 km <sup>2</sup> < Sub-basins > 300 km <sup>2</sup>                    | BL7          | 15269                   | 479                                      | No                   |

483  
484



485 **Figures and Captions**

486 Fig. 1. Cartographic representation of first four levels of Amazon Basin classification: BL1, BL2, BL3 and  
487 BL4. BL = Basin Level

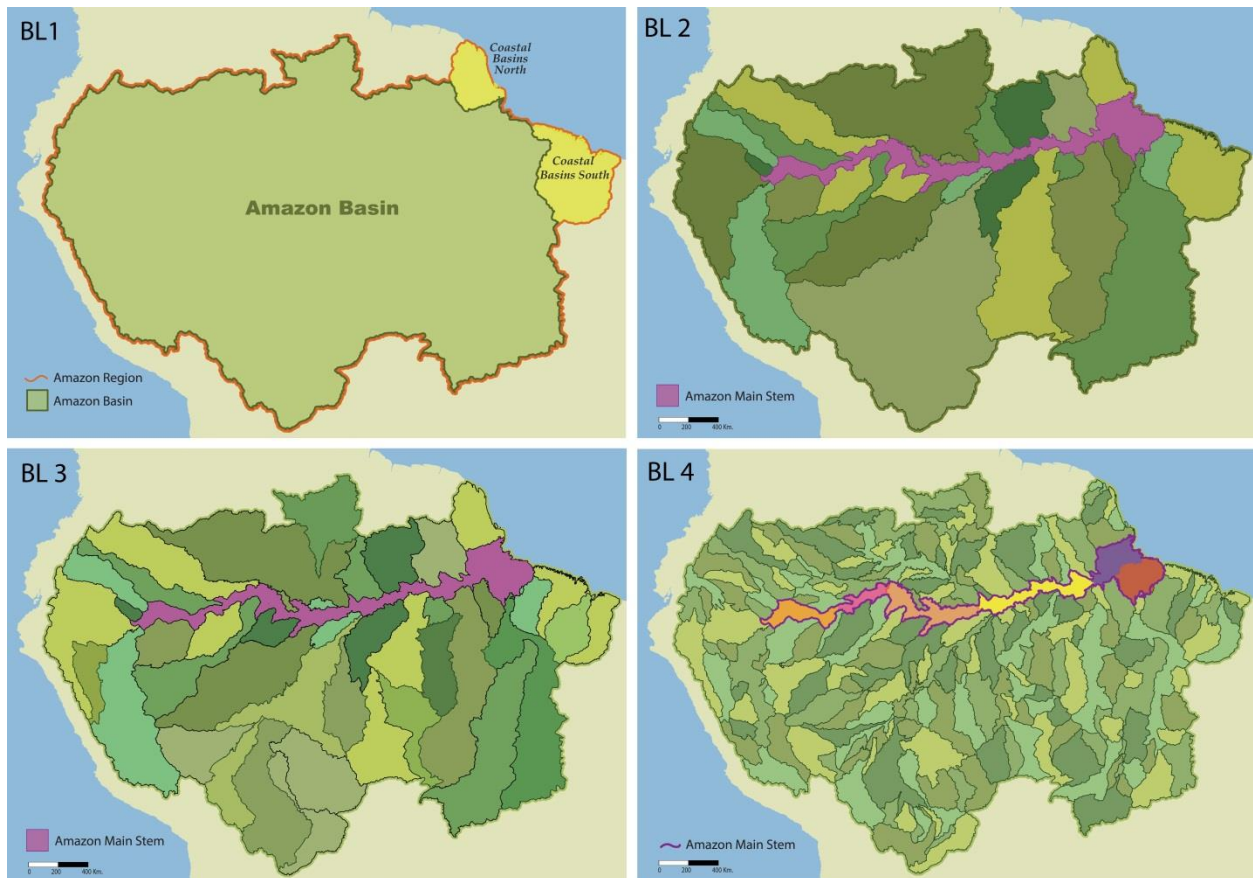

488

489

490 Fig. 2. Cartographic representation of Amazon Basin classification levels 4, 5, 6 and 7.

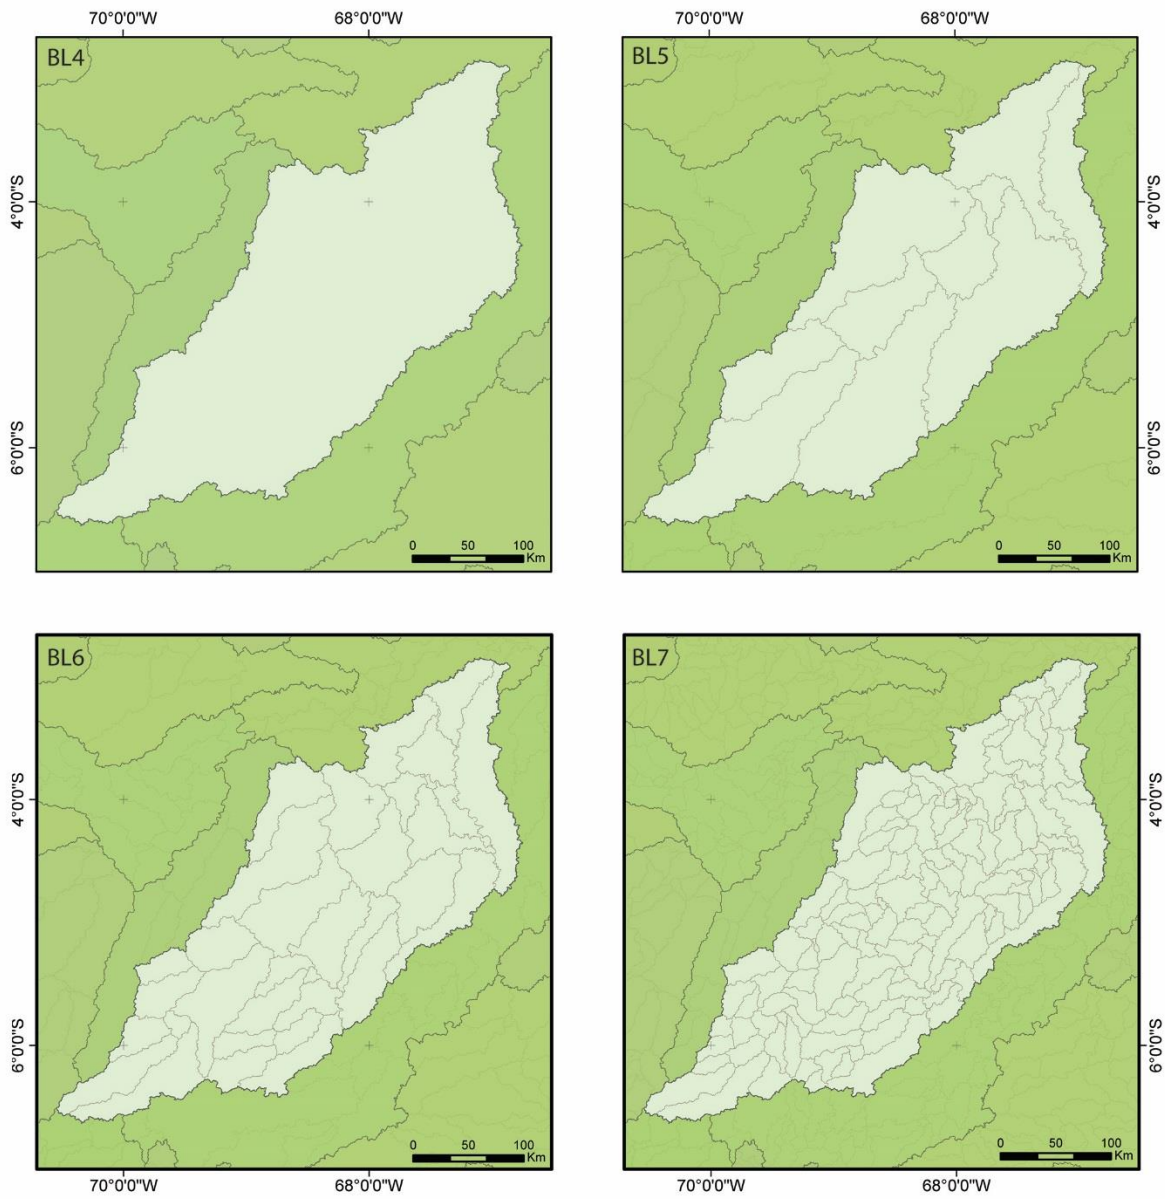

491  
492  
493  
494

495 Fig. 3. Schematic definition of main stem sub-basins.

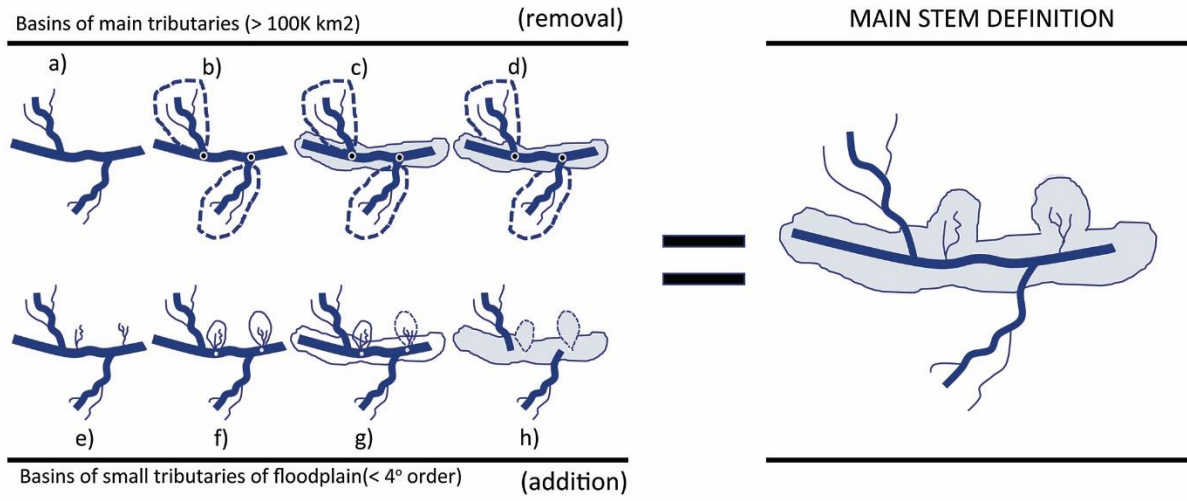

496  
497  
498  
499  
500  
501  
502  
503  
504  
505  
506  
507  
508  
509  
510  
511  
512

513 Fig. 4. Cartographic representation of Amazon River type classification .

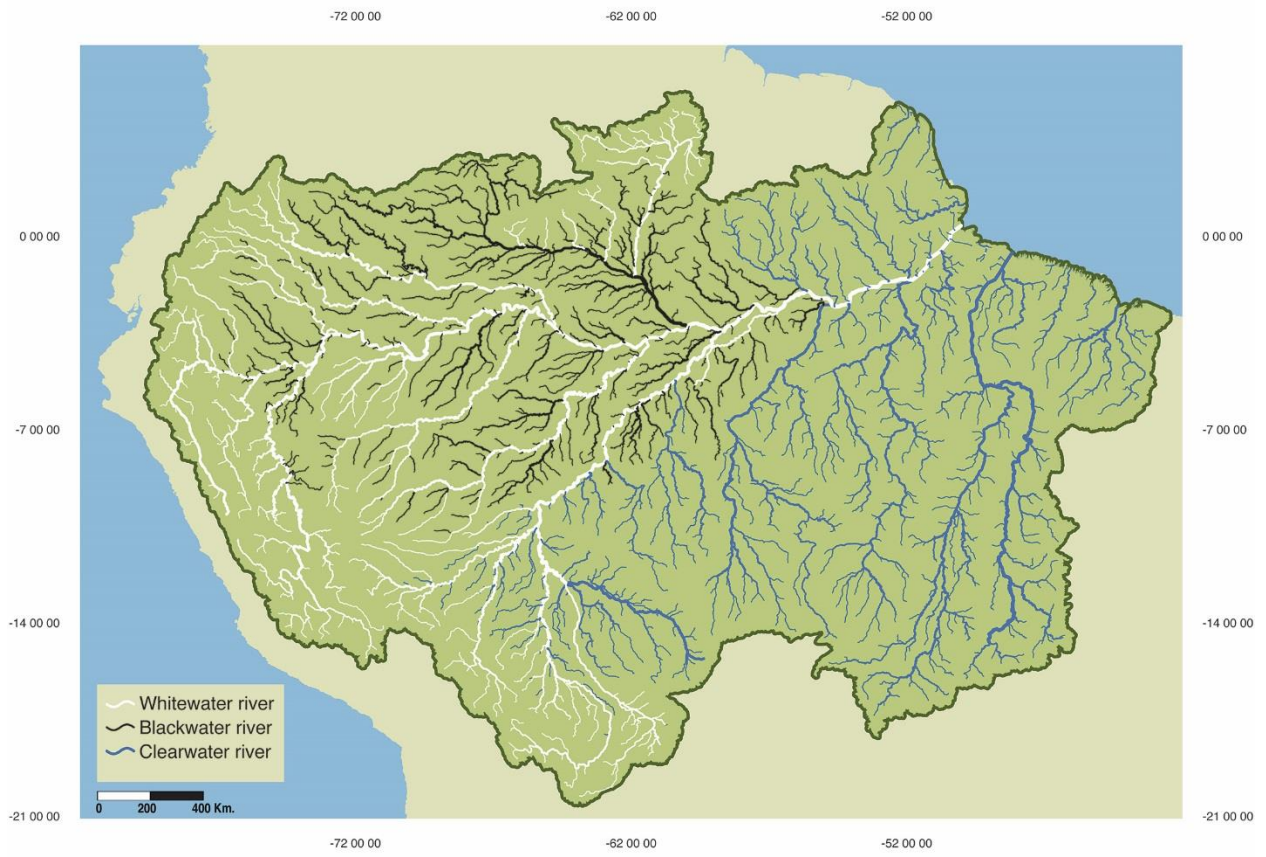

514 Fig. 5. Cartographic representation of important confluence areas for spawning, derived from the  
515 intersection of spawning nodes and sub-basins or main stem drainages important for commercial  
516 fishing.  
517

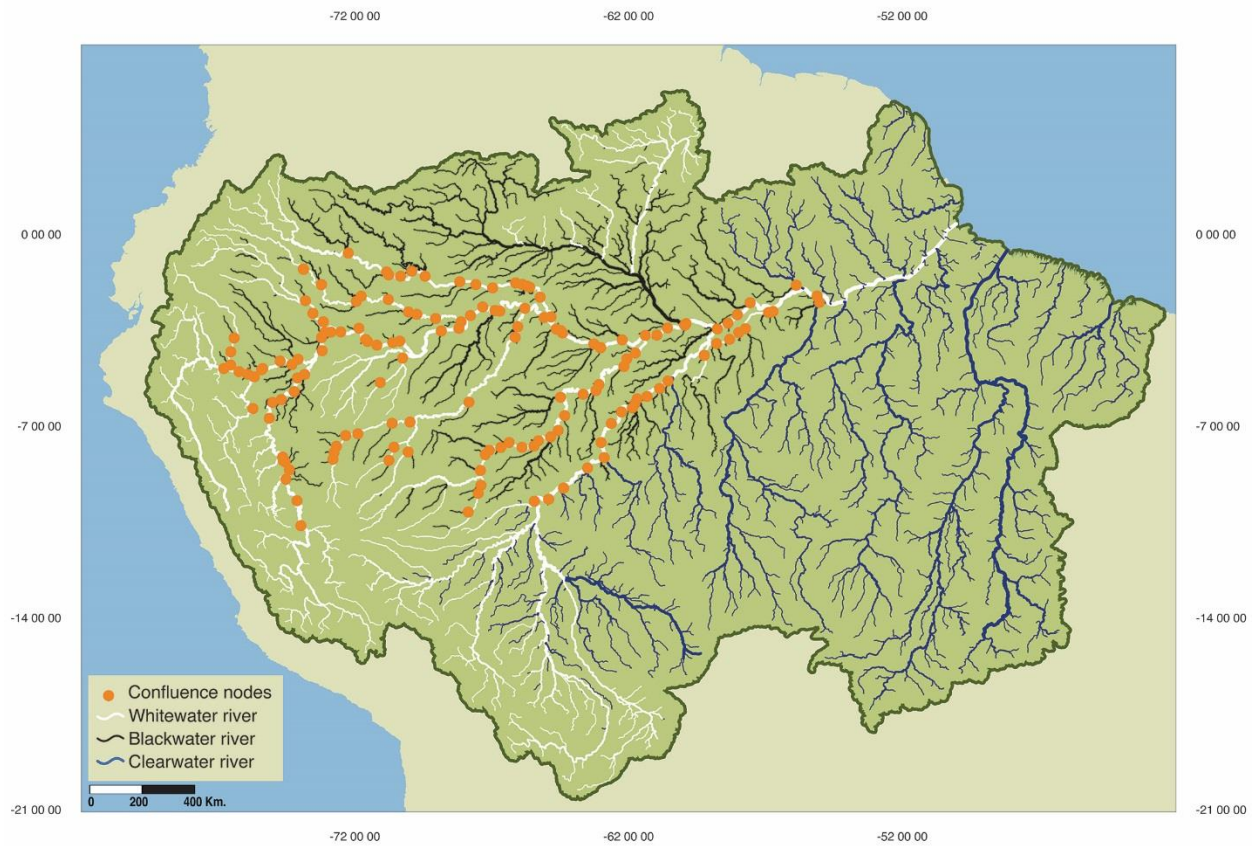

518  
519  
520  
521  
522  
523  
524  
525  
526  
527  
528

529 Fig. 6. Cartographic representation of river distances from Amazon River mouth.

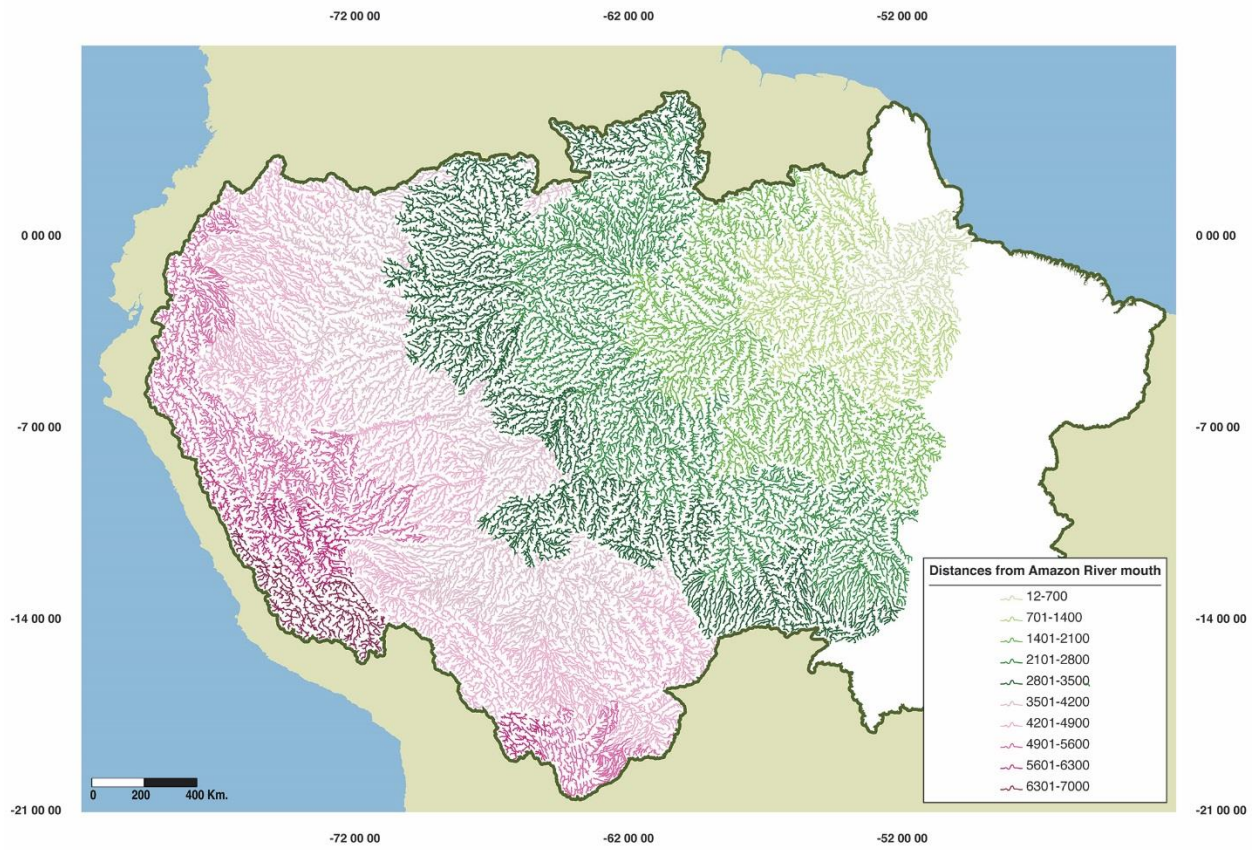

530

531
